# Supplementary material for: Two In-based organic–inorganic hybrid compounds with reversible phase transition derived from the order–disorder changes of cations or anions
Source: Royal Society of Chemistry journal article supplement (doi:10.1039/d1dt01935j), 2021-01-01
Supplement: d1dt01935j1.pdf [file d1dt01935j1.pdf]

## Supporting Information

### Two In-Based Organic–Inorganic Hybrid Compounds with Reversible Phase Transition Derived from Order-Disorder Changes of Cations or Anions

Yin-Qiang Zhang, Guan-Cheng Xu\*, and Min Li

State Key Laboratory of Chemistry and Utilization of Carbon Based Energy Resources; Key Laboratory of Advanced Functional Materials, Autonomous Region; Institute of Applied Chemistry, College of Chemistry, Xinjiang University, Urumqi, 830046, Xinjiang, PR China.

\*E-mail: [xuguanchengxju@163.com](mailto:xuguanchengxju@163.com)

1. Methods
2. Figure S1. The TG curves of compounds **1** (a) and **2** (b) in flowing air with a heating rate of 5 K/min.
3. Figure S2. IR spectrum of compounds **1** and **2**.
4. Figure S3. PXRD of compounds **1** and **2**.
5. Figure S4. DSC curves of **1** (a) and **2** (b) at different sweeping rates.
6. Figure S5. Temperature-dependence of imaginary part ( $\epsilon''$ ) of dielectric permittivity of compounds **1** and **2** measured at selected frequencies.
7. Table S1. Selected crystal data for compounds **1** and **2**.
8. Table S2. Selected bond lengths (Å) and angles (°) for compounds **1** and **2**.
9. Table S3. Selected hydrogen bonds for compound **1**.

## **Methods:**

### **Thermal measurements**

The thermogravimetric measurement (TG) was performed using a TA SDT650 instrument under a flowing air atmosphere with a heating rate of 5 K/min. Since halogen can cause damage to the instrument, compounds **1** and **2** only test to the decomposition temperature. Differential scanning calorimetry (DSC) measurements were performed on a Netzsch 200F3 instrument with sweeping rates of 10 K/min under a nitrogen atmosphere.

### **Single crystal X-ray diffraction**

The single crystal X-ray diffraction data for compounds **1** and **2** were recorded by a SuperNova Dual Atlas diffractometer equipped with a graphite-monochromated Cu-K $\alpha$  radiation ( $\lambda=1.54184$  Å). The crystal structures were solved by the *OLEX2* software package. All non-H atoms were subjected to anisotropic refinement and all H atoms were introduced in calculated positions. The crystal data of compounds **1** and **2** have been deposited in the Cambridge Crystallographic Database Centre as supplementary material, 2083457 (for **1** at 110 K), 2083459 (for **1** at 293K), 2083456 (for **2** at 110 K) and 2076595 (for **2** at 380 K).

### **Dielectric measurements**

The temperature dependence of real electric constant  $\varepsilon$  ( $\varepsilon = \varepsilon' - i\varepsilon''$ ), where  $\varepsilon'$  and  $\varepsilon''$  are the real and imaginary parts, respectively, was carried out on a TH2828 Precision LCR meter with sweeping rate of approximately 5 K/min at 10 kHz, 50 kHz, 100 kHz, 500 kHz and 1 MHz with an applied voltage of 1.0 V. In the dielectric experiments, the crystals of compounds **1** and **2** were ground and pressed into dense slice, the capacitor was made by painting two faces of the dense slice with silver conducting paste and using gold wires as the electrodes. After being dried by silica gel for two days, the capacitor was detected under a microscope with a Phenix CCD eye and the corresponding software.

### **Infrared measurements**

Fourier transform infrared (FT-IR) spectrum of compounds **1** and **2** were obtained using a Bruker Vertex 70 spectrophotometer within the range of 4000–400  $\text{cm}^{-1}$ .

### PXRD measurements

The powder X-Ray diffraction (PXRD) pattern was obtained on Rigaku SmatrLab SE advance diffractometer with Cu-K $\alpha$  radiation ( $\lambda = 1.54056 \text{ \AA}$ ) in the range of  $5^\circ < 2\theta < 50^\circ$ .

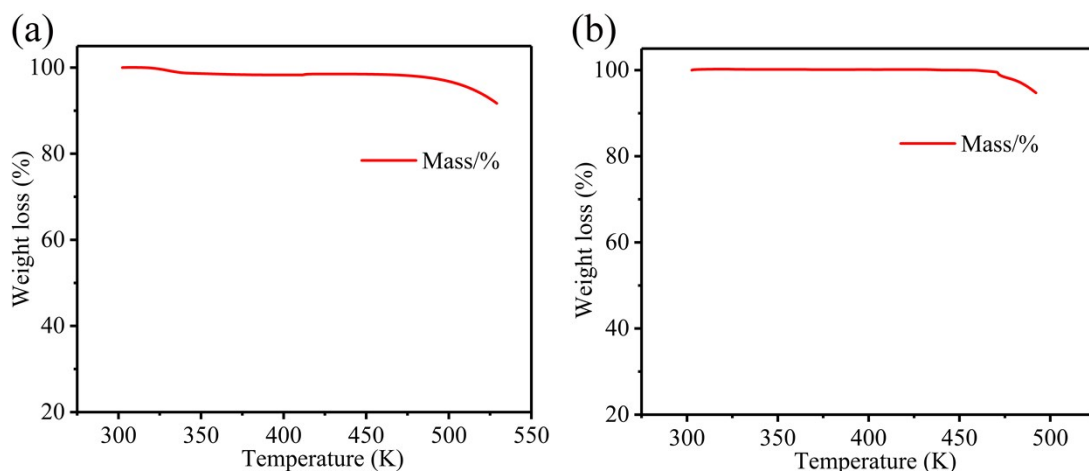

Figure S1. The TG curves of compounds **1** (a) and **2** (b) in flowing air with a heating rate of 5 K/min.

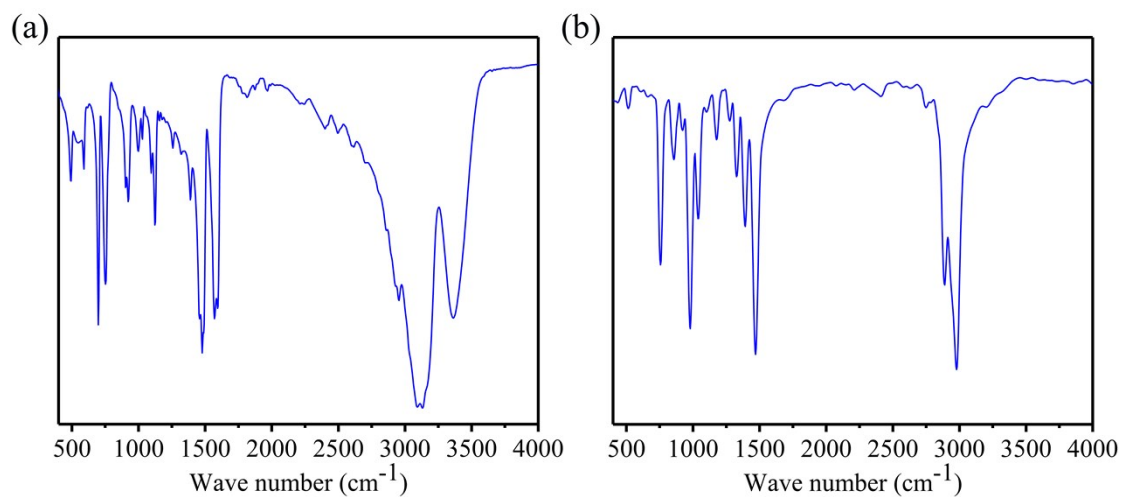

Figure S2. IR spectrum of compounds **1** and **2**.

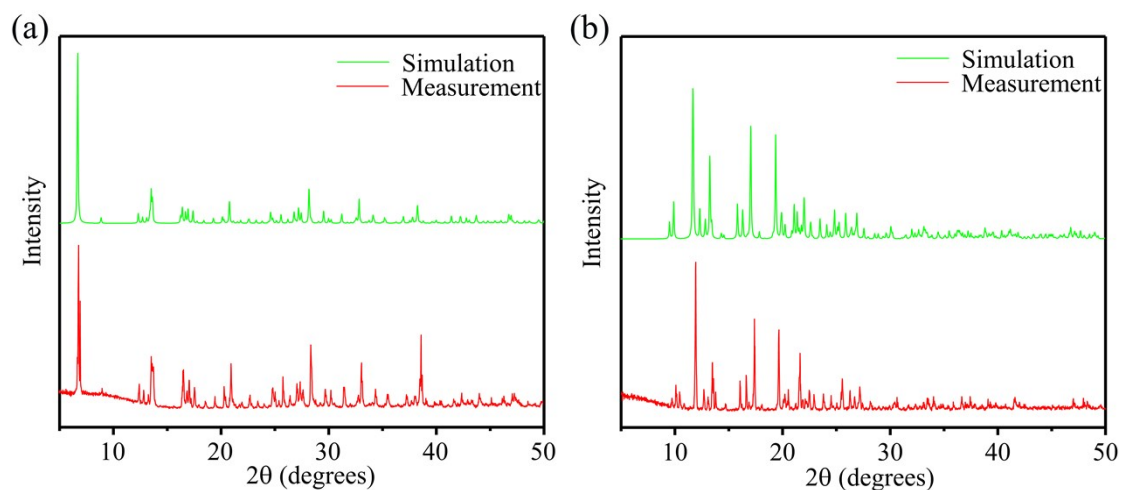

Figure S3. PXRD of compounds **1** and **2**.

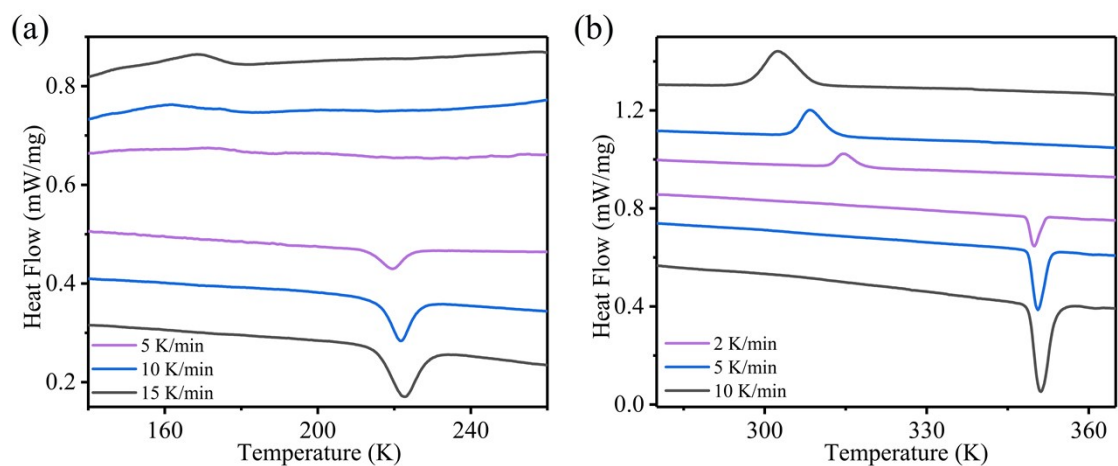

Figure S4. DSC curves of **1** (a) and **2** (b) at different sweeping rates.

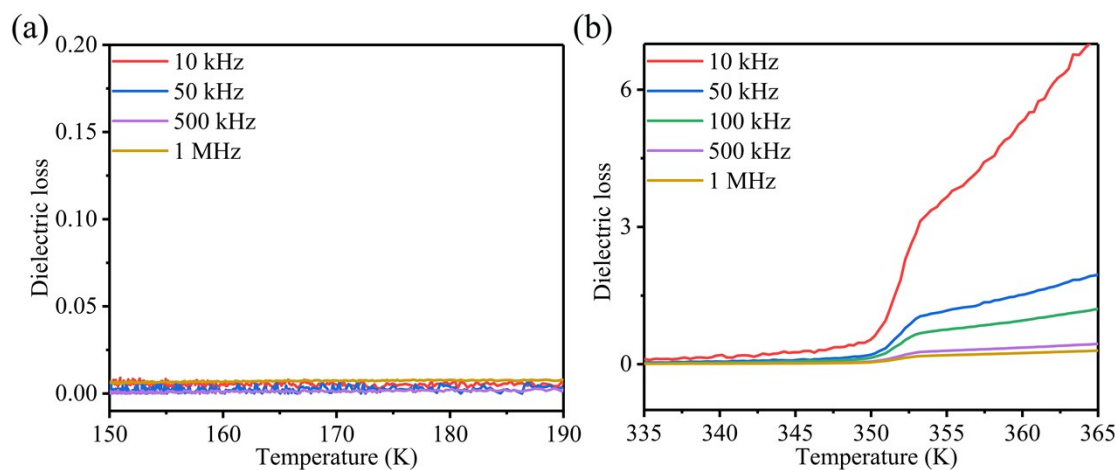

Figure S5. Temperature-dependence of imaginary part ( $\epsilon''$ ) of dielectric permittivity of compounds **1** and **2** measured at selected frequencies.

Table S1. Selected crystallographic data for compounds **1** and **2**.

| compounds                                                                               | <b>1</b>                                                           |                                                                    | <b>2</b>                                                           |                                                                    |
|-----------------------------------------------------------------------------------------|--------------------------------------------------------------------|--------------------------------------------------------------------|--------------------------------------------------------------------|--------------------------------------------------------------------|
| Temperature/K                                                                           | 110                                                                | 293                                                                | 110                                                                | 380                                                                |
| Moiety<br>formula                                                                       | C <sub>16</sub> H <sub>26</sub> Br <sub>5</sub> InN <sub>2</sub> O |                                                                    | C <sub>12</sub> H <sub>28</sub> Cl <sub>4</sub> InN                |                                                                    |
| Formula<br>weight                                                                       | 776.76                                                             |                                                                    | 442.97                                                             |                                                                    |
| Crystal system                                                                          | monoclinic                                                         | monoclinic                                                         | orthorhombic                                                       | orthorhombic                                                       |
| Space group                                                                             | <i>P2<sub>1</sub>/n</i>                                            | <i>P2<sub>1</sub>/m</i>                                            | <i>Pbca</i>                                                        | <i>Pbca</i>                                                        |
| <i>a</i> /Å                                                                             | 14.264(19)                                                         | 10.912(8)                                                          | 13.6589(10)                                                        | 14.299(4)                                                          |
| <i>b</i> /Å                                                                             | 8.874(12)                                                          | 8.556(7)                                                           | 16.4433(12)                                                        | 16.580(5)                                                          |
| <i>c</i> /Å                                                                             | 19.71(3)                                                           | 14.164(11)                                                         | 17.4222(12)                                                        | 17.771(5)                                                          |
| $\alpha$ /°                                                                             | 90                                                                 | 90                                                                 | 90                                                                 | 90                                                                 |
| $\beta$ /°                                                                              | 109.673(18)                                                        | 110.910(14)                                                        | 90                                                                 | 90                                                                 |
| $\gamma$ /°                                                                             | 90                                                                 | 90                                                                 | 90                                                                 | 90                                                                 |
| <i>V</i> (Å <sup>3</sup> )                                                              | 2349(5)                                                            | 1235.3(17)                                                         | 3913.0(5)                                                          | 4213(2)                                                            |
| <i>Z</i>                                                                                | 4                                                                  | 2                                                                  | 8                                                                  | 8                                                                  |
| $\rho_{calc}$ (g/cm <sup>-3</sup> )                                                     | 2.196                                                              | 2.083                                                              | 1.504                                                              | 1.397                                                              |
| <i>F</i> (000)                                                                          | 1472.0                                                             | 732.0                                                              | 1792.0                                                             | 1792.0                                                             |
| <i>GOF</i> on <i>F</i> <sup>2</sup>                                                     | 1.005                                                              | 1.009                                                              | 1.055                                                              | 0.941                                                              |
| <i>R</i> <sub>1</sub> , <i>wR</i> <sub>2</sub> [ <i>I</i> ><br>2 $\sigma$ ( <i>I</i> )] | <i>R</i> <sub>1</sub> = 0.0333,<br><i>wR</i> <sub>2</sub> = 0.0624 | <i>R</i> <sub>1</sub> = 0.0921,<br><i>wR</i> <sub>2</sub> = 0.2229 | <i>R</i> <sub>1</sub> = 0.0294,<br><i>wR</i> <sub>2</sub> = 0.0678 | <i>R</i> <sub>1</sub> = 0.0611,<br><i>wR</i> <sub>2</sub> = 0.1339 |
| <i>R</i> indices (all<br>data)                                                          | <i>R</i> <sub>1</sub> = 0.0608,<br><i>wR</i> <sub>2</sub> = 0.0710 | <i>R</i> <sub>1</sub> = 0.1548,<br><i>wR</i> <sub>2</sub> = 0.2602 | <i>R</i> <sub>1</sub> = 0.0386,<br><i>wR</i> <sub>2</sub> = 0.0737 | <i>R</i> <sub>1</sub> = 0.2182,<br><i>wR</i> <sub>2</sub> = 0.1970 |
| Reflections<br>collected                                                                | 19349                                                              | 5950                                                               | 32563                                                              | 13781                                                              |
| $\Delta\rho^a$ (e Å <sup>-3</sup> )                                                     | 1.06/-0.82                                                         | 3.02/-2.16                                                         | 0.45/-0.37                                                         | 0.44/-0.34                                                         |

Table S2. Selected bond lengths (Å) and angles (°) for compounds **1** and **2**.

---

|                  |          |             |          |
|------------------|----------|-------------|----------|
| <b>1</b> (110 K) |          |             |          |
| In1–Br1          | 2.666(3) | C4–C5       | 1.400(7) |
| In1–Br2          | 2.683(3) | C5–C6       | 1.377(8) |
| In1–Br3          | 2.603(4) | C6–C7       | 1.372(8) |
| In1–Br4          | 2.620(3) | C7–C8       | 1.408(7) |
| In1–Br5          | 2.691(3) | C9–C10      | 1.516(7) |
| In1–O1           | 2.277(4) | C10–C11     | 1.511(7) |
| N1–C1            | 1.502(6) | C11–C12     | 1.376(7) |
| N2–C9            | 1.501(6) | C11–C16     | 1.385(7) |
| C1–C2            | 1.495(6) | C12–C13     | 1.393(8) |
| C2–C3            | 1.516(7) | C13–C14     | 1.383(8) |
| C3–C4            | 1.387(6) | C14–C15     | 1.370(8) |
| C3–C8            | 1.389(7) | C15–C16     | 1.392(8) |
| Br1–In1–Br2      | 89.99(1) | C4–C3–C8    | 118.1(5) |
| Br1–In1–Br5      | 88.70(1) | C8–C3–C2    | 120.7(4) |
| Br3–In1–Br1      | 92.45(3) | C3–C4–C5    | 120.7(5) |
| Br3–In1–Br2      | 92.62(2) | C6–C5–C4    | 120.1(5) |
| Br3–In1–Br4      | 97.24(2) | C7–C6–C5    | 120.6(5) |
| Br3–In1–Br5      | 94.44(3) | C6–C7–C8    | 119.0(5) |
| Br4–In1–Br2      | 89.46(1) | C3–C8–C7    | 121.5(5) |
| Br4–In1–Br5      | 90.66(1) | C11–C10–C9  | 111.4(4) |
| O1–In1–Br1       | 85.46(8) | C12–C11–C10 | 121.6(5) |
| O1–In1–Br2       | 87.91(8) | C12–C11–C16 | 118.2(5) |
| O1–In1–Br4       | 84.85(8) | C16–C11–C10 | 120.2(4) |
| O1–In1–Br5       | 85.01(8) | C11–C12–C13 | 121.1(5) |
| C2–C1–N1         | 110.0(4) | C14–C13–C12 | 119.8(5) |
| N2–C9–C10        | 111.2(4) | C15–C14–C13 | 119.8(5) |
| C1–C2–C3         | 112.0(4) | C14–C15–C16 | 119.9(5) |
| C4–C3–C2         | 121.2(4) | C11–C16–C15 | 121.2(5) |

---

**1** (293 K)

|          |          |         |      |
|----------|----------|---------|------|
| In1–Br2A | 2.656(3) | C15–C14 | 1.39 |
|----------|----------|---------|------|

|               |           |             |           |
|---------------|-----------|-------------|-----------|
| In1–Br2       | 2.656(3)  | C14–C13     | 1.39      |
| In1–Br3       | 2.686(8)  | C13–C12     | 1.39      |
| In1–Br3A      | 2.686(8)  | C8–C3       | 1.330(2)  |
| In1–Br1       | 2.596(2)  | C8–C7       | 1.29(2)   |
| In1–O1        | 2.302(6)  | C3–C2       | 1.55(2)   |
| N2–C9         | 1.446(1)  | C3–C4       | 1.41(2)   |
| N1–C1A        | 1.478(2)  | C5–C4       | 1.374(2)  |
| C11–C16       | 1.39      | C5–C6       | 1.369(1)  |
| C11–C12       | 1.39      | C7–C6       | 1.27(2)   |
| C11–C10       | 1.613(2)  | C10–C9      | 1.246(2)  |
| C16–C15       | 1.39      | C2–C1A      | 1.41(4)   |
| Br2A–In1–Br2  | 92.68(7)  | C12–C11–C10 | 116.3(8)  |
| Br2–In1–Br3   | 89.61(7)  | C11–C16–C15 | 120       |
| Br2A–In1–Br3A | 89.61(7)  | C16–C15–C14 | 120       |
| Br3A–In1–Br3  | 86.56(8)  | C15–C14–C13 | 120       |
| Br1–In1–Br2A  | 96.29(4)  | C12–C13–C14 | 120       |
| Br1–In1–Br2   | 96.29(4)  | C13–C12–C11 | 120       |
| Br1–In1–Br3A  | 93.04(4)  | C7–C8–C3    | 127.8(17) |
| Br1–In1–Br3   | 93.04(4)  | C8–C3–C2    | 131.7(16) |
| O1–In1–Br2A   | 82.53(14) | C8–C3–C4    | 113.1(14) |
| O1–In1–Br2    | 82.53(14) | C4–C3–C2    | 114.8(12) |
| O1–In1–Br3    | 88.21(15) | C6–C5–C4    | 126.2(12) |
| O1–In1–Br3A   | 88.21(15) | C6–C7–C8    | 122.8(14) |
| C2–C1A–N1     | 120(2)    | C9–C10–C11  | 116.6(15) |
| N2–C9–C10     | 120.1(14) | C1A–C2–C3   | 112.1(16) |
| C16–C11–C12   | 120       | C5–C4–C3    | 113.5(10) |
| C16–C11–C10   | 123.7(8)  | C7–C6–C5    | 111.8(12) |

---

A=1+X, 1/2-Y, +Z

---

**2** (110 K)

|         |          |         |          |
|---------|----------|---------|----------|
| In1–Cl1 | 2.355(2) | C10–C11 | 1.515(3) |
| In1–Cl2 | 2.355(2) | C1–C2   | 1.510(3) |
| In1–Cl4 | 2.348(7) | C4–C5   | 1.514(3) |

|             |            |             |            |
|-------------|------------|-------------|------------|
| In1-Cl3     | 2.337(9)   | C7-C8       | 1.520(3)   |
| N1-C10      | 1.519(3)   | C12-C11     | 1.531(3)   |
| N1-C1       | 1.521(3)   | C5-C6       | 1.514(3)   |
| N1-C4       | 1.514(3)   | C8-C9       | 1.517(3)   |
| N1-C7       | 1.524(3)   | C2-C3       | 1.532(3)   |
| Cl1-In1-Cl2 | 107.15(3)  | C4-N1-C1    | 108.07(17) |
| Cl4-In1-Cl1 | 109.11(2)  | C4-N1-C7    | 111.44(17) |
| Cl4-In1-Cl2 | 108.40(3)  | C11-C10-N1  | 117.05(19) |
| Cl3-In1-Cl1 | 111.36(3)  | C2-C1-N1    | 116.51(19) |
| Cl3-In1-Cl2 | 108.66(3)  | C5-C4-N1    | 115.71(18) |
| Cl3-In1-Cl4 | 112.00(3)  | C8-C7-N1    | 114.73(19) |
| C10-N1-C1   | 110.92(16) | C4-C5-C6    | 109.7(2)   |
| C10-N1-C7   | 107.19(17) | C9-C8-C7    | 110.6(2)   |
| C1-N1-C7    | 109.74(16) | C1-C2-C3    | 108.2(2)   |
| C4-N1-C10   | 109.50(17) | C10-C11-C12 | 107.6(2)   |

---

**2 (380 K)**

|               |          |            |          |
|---------------|----------|------------|----------|
| In1-Cl2       | 2.324(3) | N1-C1      | 1.519(1) |
| In1-Cl3A      | 2.31(8)  | C10-C11    | 1.424(1) |
| In1-Cl1A      | 2.29(2)  | C7-C8      | 1.386(1) |
| In1-Cl4A      | 2.346(9) | C4-C5      | 1.344(1) |
| In1-Cl4       | 2.350(1) | C1-C2      | 1.356(2) |
| In1-Cl3       | 2.326(7) | C11-C12    | 1.477(2) |
| In1-Cl1       | 2.315(4) | C2-C3      | 1.511(2) |
| N1-C10        | 1.541(1) | C8-C9      | 1.450(1) |
| N1-C7         | 1.479(1) | C6-C5      | 1.515(1) |
| N1-C4         | 1.487(1) |            |          |
| Cl2-In1-Cl4A  | 112.0(6) | C7-N1-C1   | 110.0(9) |
| Cl2-In1-Cl4   | 101.2(8) | C4-N1-C10  | 110.4(9) |
| Cl2-In1-Cl3   | 108.5(7) | C4-N1-C1   | 110.4(8) |
| Cl3A-In1-Cl2  | 125(4)   | C1-N1-C10  | 106.6(8) |
| Cl3A-In1-Cl4A | 99(4)    | C11-C10-N1 | 119.1(1) |
| Cl1A-In1-Cl2  | 118(2)   | C8-C7-N1   | 124.8(1) |



|               |           |             |          |
|---------------|-----------|-------------|----------|
| Cl1A–In1–Cl3A | 116(5)    | C5–C4–N1    | 126.0(1) |
| Cl3–In1–Cl4   | 105.0(9)  | C2–C1–N1    | 122.0(1) |
| Cl1–In1–Cl2   | 110.81(2) | C10–C11–C12 | 116.4(1) |
| Cl1–In1–Cl4   | 120.2(1)  | C1–C2–C3    | 113.1(1) |
| Cl1–In1–Cl3   | 110.4(3)  | C7–C8–C9    | 121.2(1) |
| C7–N1–C10     | 111.2(7)  | C4–C5–C6    | 118.5(1) |
| C7–N1–C4      | 108.4(7)  |             |          |

Table S3. Selected hydrogen bonds for compounds **1**.

| <b>1</b> (110 K) |        |          |          |        |                         |
|------------------|--------|----------|----------|--------|-------------------------|
| D–H···A          | d(D–H) | d(H···A) | d(D···A) | ∠(DHA) | A                       |
| N1–H1B···Br2     | 0.89   | 2.52     | 3.356(6) | 156    | [1/2-x, -1/2+y, 1/2-z]  |
| N2–H2C···Br4     | 0.89   | 2.50     | 3.376(6) | 168    | [-1/2-x, -1/2+y, 1/2-z] |
| <b>1</b> (293 K) |        |          |          |        |                         |
| N1–H1A···Br2     | 0.89   | 2.51     | 3.389(3) | 169    | [x, 1/2-y, z]           |
| N1–H1C···Br2     | 0.89   | 2.82     | 3.389(3) | 124    |                         |
| N2–H2B···Br3     | 0.89   | 2.73     | 3.514(3) | 148    | [-x, -1/2-y, z]         |
